# Supplementary material
Source: publisher site journal article supplement (https://www.spandidos-publications.com/2492/downloadSupplementary)
Supplement: Supplementary file 1 [file downloadSupplementary]

## Sheet: SFuniCoxResult.Sig
Table SII. Each splicing gene as an independent prognostic factor analyzed by Kaplan-Meier survival analysis.
ID	Hazard ratio	Low values of the 95% CI	High values of the 95% CI	P-value
HSPB1	1.0026	1.00106	1.00414	0.000961198
CELF6	3990.95	28.1746	565321	0.00103469
TIA1	0.947887	0.916995	0.97982	0.00154622
HSPA5	1.0041	1.0014	1.0068	0.00293729
TIAL1	0.899612	0.836634	0.96733	0.00427709
FAM50B	1.08307	1.02266	1.14704	0.00642353
PRMT5	0.965523	0.940612	0.991094	0.00852015
PQBP1	0.972375	0.952034	0.993151	0.00940152
PTBP2	0.800562	0.66686	0.96107	0.0170392
EEF1A1	0.999502	0.99909	0.999915	0.0180483
HNRNPC	0.988247	0.978361	0.998233	0.0211764
SEC31B	0.847689	0.734822	0.977892	0.0234132
SNRNP40	0.954941	0.917047	0.994401	0.0256326
SNRPB	0.997138	0.994582	0.999701	0.0286395
ILF2	0.99425	0.989108	0.999419	0.0292784
LSM6	1.11302	1.01009	1.22643	0.0305575
LSM2	0.993945	0.988389	0.999532	0.0336883
HNRNPL	0.973214	0.948614	0.998451	0.0376515
DDX17	0.988199	0.977049	0.999476	0.0403194
RBMX	0.984102	0.968966	0.999474	0.0427093
PRPF39	0.89674	0.806978	0.996487	0.0428295
INTS7	0.909191	0.828287	0.997997	0.0452716
MYEF2	0.906222	0.822915	0.997963	0.0453481
NOSIP	0.973887	0.94897	0.999458	0.0453937
SRSF11	0.969756	0.940508	0.999913	0.0493555
